# Supplementary material for: Mycotoxin Analysis of Grain via Dust Sampling: Review, Recent Advances and the Way Forward: The Contribution of the MycoKey Project
Source: MDPI journal article supplement (doi:10.3390/toxins14060381), 2022-05-31
Supplement: s1 [file s1]

# Supplementary Materials: Mycotoxin Analysis of Grain via Dust Sampling: Review, Recent Advances and the Way Forward: the Contribution of the MycoKey Project

Biancamaria Ciasca, Sarah De Saeger, Marthe De Boevre, Mareike Reichel, Michelangelo Pascale, Antonio F. Logrieco and Veronica M. T. Lattanzio

**Table S1.** Parameters used for data acquisition in selected reaction monitoring (SRM).

| Compound | Target m/z | Target ion                        | Cone Voltage (V) | Fragment ions | Collision energy (eV) | RT (min) |
|----------|------------|-----------------------------------|------------------|---------------|-----------------------|----------|
| NIV      | 313        | [M+H] <sup>+</sup>                | 35               | 177           | 21                    | 4.2      |
|          |            |                                   |                  | 175*          | 16                    |          |
| DON      | 297        | [M+H] <sup>+</sup>                | 40               | 231           | 9                     | 4.9      |
|          |            |                                   |                  | 249*          | 9                     |          |
| AFB1     | 313.1      | [M+H] <sup>+</sup>                | 65               | 241           | 32                    | 7.5      |
|          |            |                                   |                  | 285           | 20                    |          |
| HT-2     | 442.3      | [M+NH <sub>4</sub> ] <sup>+</sup> | 40               | 215*          | 12                    | 8.2      |
|          |            |                                   |                  | 263           | 12                    |          |
| FB1      | 722.4      | [M+H] <sup>+</sup>                | 40               | 334           | 36                    | 8.3      |
|          |            |                                   |                  | 352*          | 32                    |          |
| T-2      | 484.3      | [M+NH <sub>4</sub> ] <sup>+</sup> | 40               | 215*          | 18                    | 8.7      |
|          |            |                                   |                  | 305           | 12                    |          |
| ZEN      | 319.2      | [M+H] <sup>+</sup>                | 40               | 187           | 18                    | 9.2      |
|          |            |                                   |                  | 283*          | 12                    |          |
| OTA      | 404.0      | [M+H] <sup>+</sup>                | 30               | 221           | 30                    | 9.4      |
|          |            |                                   |                  | 240*          | 20                    |          |
| FB2      | 706.1      | [M+H] <sup>+</sup>                | 70               | 354           | 30                    | 9.2      |
|          |            |                                   |                  | 336*          | 36                    |          |

\* Transition used for analyte quantification, retention time (RT), volt (V), electronvolt (eV).

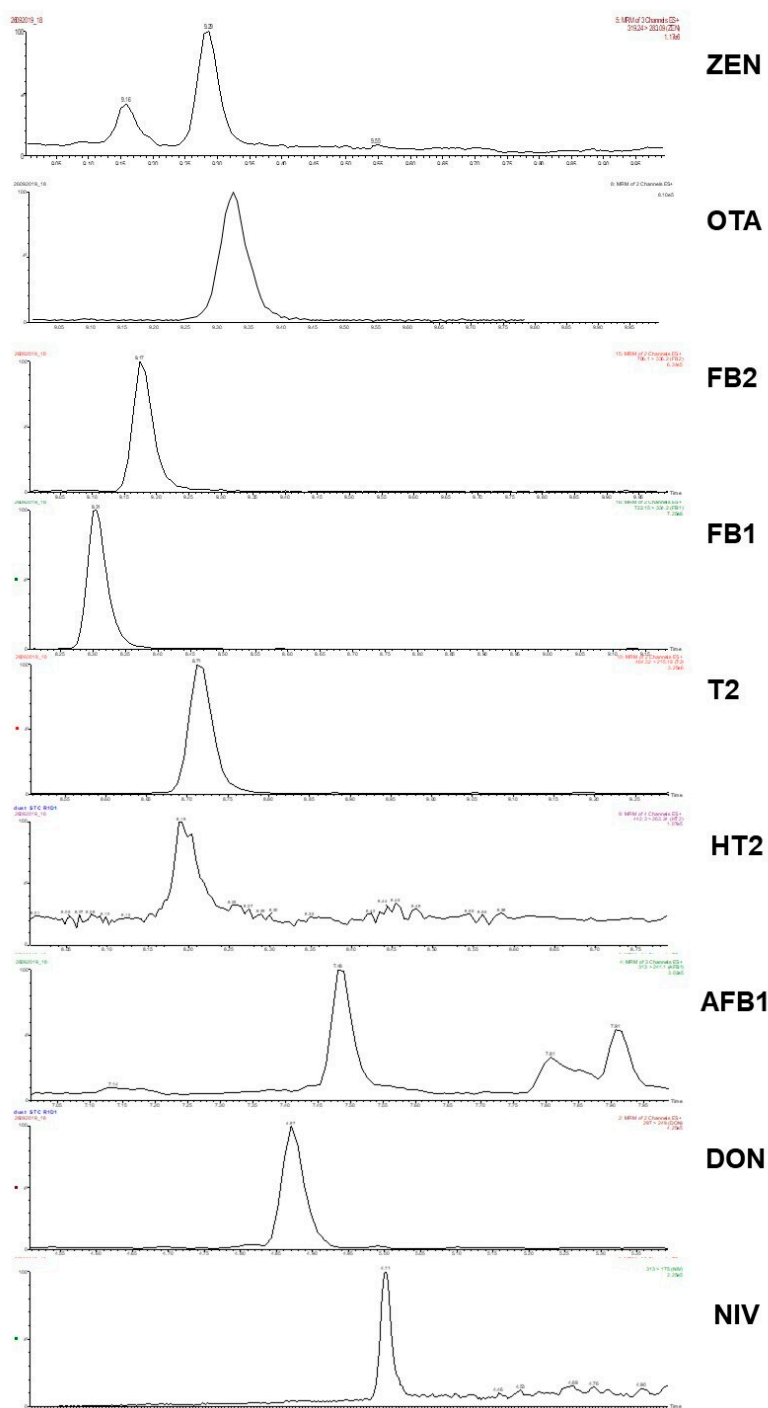

**Figure S1.** Selected ion chromatogram (quantifier SRM – select ion monitoring transition) of a dust sample extract spiked with nivalenol (NIV), deoxinivalenol (DON), Fuminisin B1 (FB1), Fumonisin B2 (FB2) 1000 µg/kg; HT2 toxin (HT2) and T-2 toxin (T2) 250 µg/kg; zeralenon (ZEN) 500 µg/kg, ochratoxin A (OTA) 15 µg/kg; aflatoxin B1 (AFB1) 10 µg/kg.

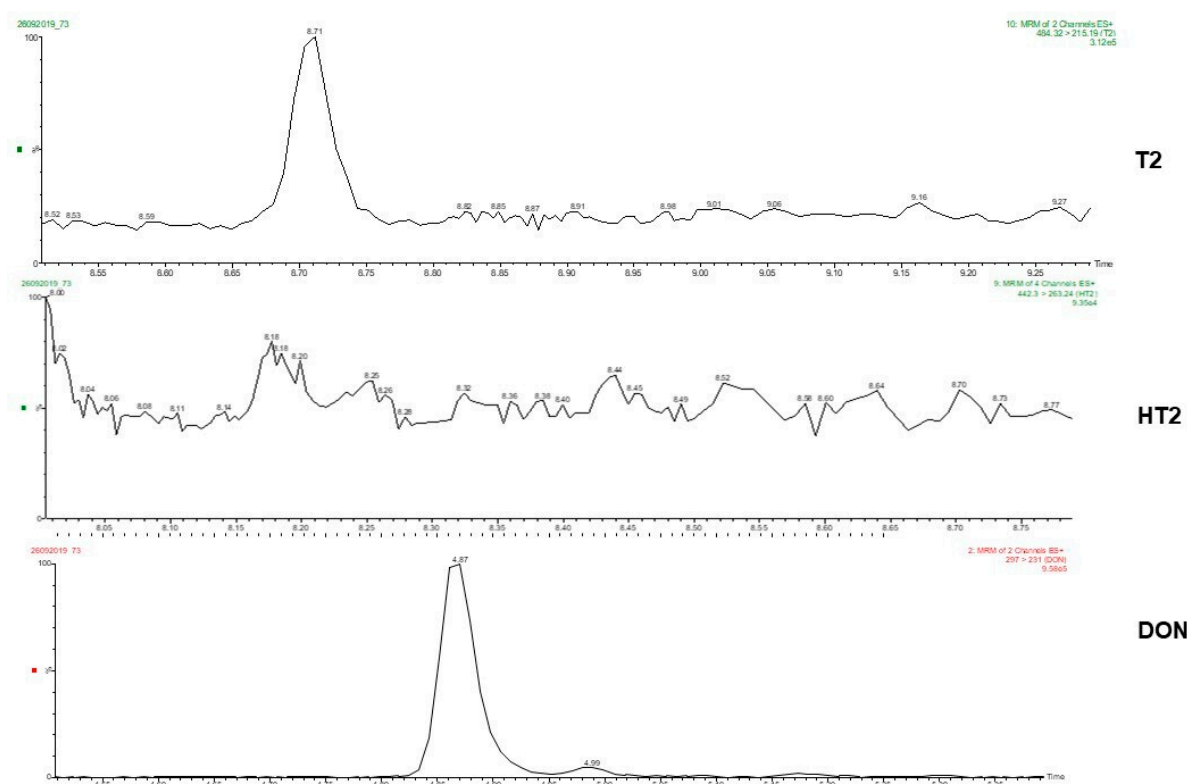

**Figure S2.** : Selected ion chromatogram (quantifier SRM – select ion monitoring transition) of a dust sample extract naturally contaminated with deoxinivalenol (DON) 7282 µg/kg, T-2 toxin (T2) 16 µg/kg and trace of HT-2 toxin (HT2) (< LOQ).

**Table S2.** In-house analytical performances of the LC-MS/MS method for multimycotoxins method in grains and dust, including spiking levels set at 25% of target level (µg/kg) and 100% of target level, mean recovery %, and the total relative standard deviation of the measurements - intermediate precision (RSDip, %). Mean recovery and RSDip, % are calculated from the results of 12 experiments (three independent replicates for 4 days over a time period of 1 year).

| GRAINS (maize/wheat) |                             |                                           |                                 |                                           |
|----------------------|-----------------------------|-------------------------------------------|---------------------------------|-------------------------------------------|
|                      | 25% of target level (µg/kg) | Mean Recovery, %<br>(RSDIP, %)*<br>(n=12) | 100% of target level<br>(µg/kg) | Mean Recovery, %<br>(RSDIP, %)*<br>(n=12) |
| NIV                  | 250                         | 102 (16)                                  | 1000                            | 95 (15)                                   |
| DON                  | 250                         | 95 (21)                                   | 1000                            | 91 (19)                                   |
| AFB <sub>1</sub>     | 2.5                         | 99 (15)                                   | 10                              | 98 (7)                                    |
| HT2                  | 12.5                        | 114 (26)                                  | 50                              | 102 (11)                                  |
| T2                   | 12.5                        | 110 (6)                                   | 50                              | 100 (11)                                  |
| FB1                  | 250                         | 110 (10)                                  | 1000                            | 106 (27)                                  |
| FB2                  | 250                         | 104 (19)                                  | 1000                            | 107 (9)                                   |
| OTA                  | 2                           | 125 (13)                                  | 8                               | 125 (13)                                  |
| ZEN                  | 25                          | 89 (22)                                   | 100                             | 111 (23)                                  |
| DUST (maize/wheat)   |                             |                                           |                                 |                                           |
|                      | 25% of target level (µg/kg) | Mean Recovery, %<br>(RSDIP, %)*           | 100% of target level<br>(µg/kg) | Mean Recovery, %<br>(RSDIP, %)*           |
| NIV                  | 250                         | 80 (20)                                   | 1000                            | 101 (22)                                  |
| DON                  | 250                         | 91 (21)                                   | 1000                            | 100 (32)                                  |
| AFB <sub>1</sub>     | 2.5                         | 88 (13)                                   | 10                              | 88 (16)                                   |

|            |      |          |      |          |
|------------|------|----------|------|----------|
| <b>HT2</b> | 62.5 | 78 (19)  | 250  | 89 (12)  |
| <b>T2</b>  | 62.5 | 86 (15)  | 250  | 87 (21)  |
| <b>FB1</b> | 250  | 95 (9)   | 1000 | 96 (1)   |
| <b>FB2</b> | 250  | 101 (10) | 1000 | 101 (16) |
| <b>OTA</b> | 3.7  | 84 (25)  | 15   | 103 (12) |
| <b>ZEN</b> | 125  | 77 (25)  | 500  | 81 (16)  |

**Table S3.** Expanded uncertainty (U), at 95% of confidence level, calculated using the Horwitz equation.

| U (µg/kg)     |      |       |      |        |      |       |      |       |      |     |
|---------------|------|-------|------|--------|------|-------|------|-------|------|-----|
| NIV           |      | DON   |      | T2+HT2 |      | ZEN   |      | OTA   |      |     |
| Grain         | Dust | Grain | Dust | Grain  | Dust | Grain | Dust | Grain | Dust |     |
| Trial 1       |      |       |      |        |      |       |      |       |      |     |
| Sample set 1  |      |       |      |        |      |       |      |       |      |     |
| Wagon 1       | (-)  | 118   | (-)  | 346    | (-)  | 137   | (-)  | (-)   | (-)  | (-) |
| Wagon 2       | (-)  | 73    | (-)  | 335    | (-)  | 114   | (-)  | (-)   | (-)  | (-) |
| Wagon 3       | (-)  | 67    | (-)  | 193    | (-)  | 115   | (-)  | (-)   | (-)  | (-) |
| Wagon 4       | (-)  | 43    | (-)  | 175    | (-)  | 80    | (-)  | (-)   | (-)  | (-) |
| Wagon 5       | (-)  | 101   | (-)  | 282    | (-)  | 225   | (-)  | (-)   | (-)  | (-) |
| Wagon 6       | (-)  | 68    | (-)  | 232    | (-)  | 137   | (-)  | (-)   | (-)  | (-) |
| Trial 2       |      |       |      |        |      |       |      |       |      |     |
| Sample set 2A |      |       |      |        |      |       |      |       |      |     |
| truck 1       | (-)  | 39    | (-)  | 581    | (-)  | 12    | (-)  | 26    | (-)  | (-) |
| truck 2       | (-)  | 51    | (-)  | 263    | (-)  | 6     | (-)  | (-)   | (-)  | 2   |
| truck 3       | (-)  | 36    | 20   | 732    | (-)  | 35    | (-)  | (-)   | (-)  | (-) |
| truck 4       | (-)  | 37    | 34   | 982    | (-)  | 7     | (-)  | 118   | (-)  | 26  |
| truck 5 A     | (-)  | 22    | 24   | 389    | (-)  | 9     | (-)  | (-)   | (-)  | (-) |
| truck 6 A     | (-)  | 68    | 35   | 1157   | (-)  | 2     | (-)  | (-)   | (-)  | 0   |
| truck 7 A     | (-)  | 129   | (-)  | 355    | (-)  | 11    | (-)  | (-)   | (-)  | (-) |
| truck 8       | (-)  | 83    | (-)  | 346    | 52   | 144   | (-)  | (-)   | (-)  | (-) |
| truck 9       | (-)  | 28    | (-)  | 381    | (-)  | 9     | (-)  | (-)   | (-)  | (-) |
| truck 10      | (-)  | 9     | (-)  | 132    | (-)  | 3     | (-)  | (-)   | (-)  | 4   |
| truck 11 A    | (-)  | 100   | (-)  | 372    | 9.5  | 121   | (-)  | (-)   | (-)  | (-) |
| truck 12      | (-)  | (-)   | (-)  | 1084   | (-)  | 4     | (-)  | (-)   | (-)  | (-) |
| truck 13      | (-)  | 42    | (-)  | 364    | 54   | 135   | (-)  | (-)   | (-)  | (-) |
| truck 14      | (-)  | 72    | 23   | 995    | (-)  | 3     | (-)  | (-)   | (-)  | (-) |
| truck 15 A    | (-)  | 43    | (-)  | 619    | (-)  | 6     | (-)  | (-)   | (-)  | (-) |
| truck 16 A    | (-)  | 76    | 36   | 1741   | (-)  | 9     | (-)  | (-)   | (-)  | (-) |
| truck 17      | (-)  | 98    | (-)  | 1276   | 4    | 78    | (-)  | 37    | (-)  | 4   |
| truck 18      | (-)  | 134   | (-)  | 1119   | (-)  | 161   | (-)  | (-)   | (-)  | (-) |
| truck 19 A    | (-)  | 72    | 15   | 1521   | (-)  | 41    | (-)  | 108   | (-)  | 9   |
| Truck 20      | (-)  | 235   | (-)  | 484    | 3    | 78    | (-)  | (-)   | (-)  | 1   |
| truck 21      | (-)  | 126   | 9    | 807    | 14   | 135   | (-)  | (-)   | (-)  | (-) |
| truck 22      | (-)  | 78    | (-)  | 944    | (-)  | 79    | (-)  | (-)   | (-)  | 2   |
| truck 23      | (-)  | 70    | 30   | 1341   | (-)  | 7     | (-)  | (-)   | (-)  | (-) |
| truck 24      | (-)  | 156   | 9    | 722    | (-)  | 10    | (-)  | (-)   | (-)  | 0   |
| truck 25      | (-)  | 146   | 11   | 820    | 11   | 130   | (-)  | (-)   | (-)  | (-) |
| truck 26      | (-)  | 84    | (-)  | 637    | (-)  | 134   | (-)  | (-)   | (-)  | (-) |
| truck 27      | (-)  | 103   | (-)  | 375    | 5    | 280   | (-)  | (-)   | (-)  | (-) |

---

|               |     |     |     |      |     |     |     |     |     |     |
|---------------|-----|-----|-----|------|-----|-----|-----|-----|-----|-----|
| truck 28 A    | (-) | 98  | (-) | 392  | 8   | 209 | (-) | (-) | (-) | 1   |
| truck 29      | (-) | 125 | 11  | 442  | 12  | 19  | (-) | 92  | (-) | 1   |
| truck 30      | (-) | 77  | 10  | 517  | 21  | 143 | (-) | (-) | (-) | (-) |
| truck 31      | (-) | 114 | 40  | 2364 | 5   | 65  | (-) | (-) | (-) | 2   |
| truck 32      | (-) | 109 | 14  | 1034 | (-) | (-) | (-) | (-) | (-) | (-) |
| Sample set 2B |     |     |     |      |     |     |     |     |     |     |
| truck 5 B     | (-) | 69  | 11  | 363  | (-) | 34  | (-) | (-) | (-) | (-) |
| truck 6 B     | (-) | 76  | 15  | 1292 | (-) | 2   | (-) | (-) | (-) | (-) |
| truck 7 B     | (-) | 196 | (-) | 728  | (-) | 81  | (-) | (-) | (-) | (-) |
| truck 11 B    | (-) | 112 | (-) | 301  | 4   | 117 | (-) | (-) | (-) | (-) |
| truck 15 B    | (-) | 46  | (-) | 729  | (-) | 7   | (-) | (-) | (-) | (-) |
| truck 16 B    | (-) | 94  | 16  | 1728 | (-) | 10  | (-) | (-) | (-) | (-) |
| truck 19 B    | (-) | (-) | 15  | 1584 | (-) | (-) | (-) | (-) | (-) | (-) |
| truck 28 B    | (-) | (-) | (-) | 276  | 8   | (-) | (-) | (-) | (-) | (-) |

---
